# Combined Evaluation of FDG-PET and MRI Improves Detection and Differentiation of Dementia

Juergen Dukart<sup>1\*</sup>, Karsten Mueller<sup>1</sup>, Annette Horstmann<sup>1</sup>, Henryk Barthel<sup>3</sup>, Harald E. Möller<sup>1</sup>, Arno Villringer<sup>1,2</sup>, Osama Sabri<sup>3</sup>, Matthias L. Schroeter<sup>1,2</sup>

**1** Max Planck Institute for Human Cognitive and Brain Sciences, Leipzig, Germany, **2** Day Clinic of Cognitive Neurology, University of Leipzig, Leipzig, Germany, **3** Department of Nuclear Medicine, University of Leipzig, Leipzig, Germany

## Abstract

**Introduction:** Various biomarkers have been reported in recent literature regarding imaging abnormalities in different types of dementia. These biomarkers have helped to significantly improve early detection and also differentiation of various dementia syndromes. In this study, we systematically applied whole-brain and region-of-interest (ROI) based support vector machine classification separately and on combined information from different imaging modalities to improve the detection and differentiation of different types of dementia.

**Methods:** Patients with clinically diagnosed Alzheimer's disease (AD: n = 21), with frontotemporal lobar degeneration (FTLD: n = 14) and control subjects (n = 13) underwent both [F18]fluorodeoxyglucose positron emission tomography (FDG-PET) scanning and magnetic resonance imaging (MRI), together with clinical and behavioral assessment. FDG-PET and MRI data were commonly processed to get a precise overlap of all regions in both modalities. Support vector machine classification was applied with varying parameters separately for both modalities and to combined information obtained from MR and FDG-PET images. ROIs were extracted from comprehensive systematic and quantitative meta-analyses investigating both disorders.

**Results:** Using single-modality whole-brain and ROI information FDG-PET provided highest accuracy rates for both, detection and differentiation of AD and FTLD compared to structural information from MRI. The ROI-based multimodal classification, combining FDG-PET and MRI information, was highly superior to the unimodal approach and to the whole-brain pattern classification. With this method, accuracy rate of up to 92% for the differentiation of the three groups and an accuracy of 94% for the differentiation of AD and FTLD patients was obtained.

**Conclusion:** Accuracy rate obtained using combined information from both imaging modalities is the highest reported up to now for differentiation of both types of dementia. Our results indicate a substantial gain in accuracy using combined FDG-PET and MRI information and suggest the incorporation of such approaches to clinical diagnosis and to differential diagnostic procedures of neurodegenerative disorders.

**Citation:** Dukart J, Mueller K, Horstmann A, Barthel H, Möller HE, et al. (2011) Combined Evaluation of FDG-PET and MRI Improves Detection and Differentiation of Dementia. PLoS ONE 6(3): e18111. doi:10.1371/journal.pone.0018111

**Editor:** Wang Zhan, University of California, San Francisco, United States of America

**Received:** August 30, 2010; **Accepted:** February 25, 2011; **Published:** March 23, 2011

**Copyright:** © 2011 Dukart et al. This is an open-access article distributed under the terms of the Creative Commons Attribution License, which permits unrestricted use, distribution, and reproduction in any medium, provided the original author and source are credited.

**Funding:** The work was funded by the Max Planck Society. The funders had no role in study design, data collection and analysis, decision to publish, or preparation of the manuscript.

**Competing Interests:** The authors have declared that no competing interests exist.

\* E-mail: dukart@cbs.mpg.de

## Introduction

In recent research, various biomarkers have been reported to differentiate between early stages of dementia and healthy control subjects or between different types of neurodegenerative disorders, suggesting an integration of these would improve diagnostic accuracy of dementia [1]–[9].

For the detection of dementia, accuracy rates significantly above 90% have recently been reported using univariate and multivariate statistical approaches in magnetic resonance imaging (MRI) and [F18]fluorodeoxyglucose positron emission tomography (FDG-PET) [1],[10]–[14]. However, the differentiation of the two most common types of dementia, namely Alzheimer's disease (AD) and frontotemporal lobar degeneration (FTLD), is still

problematic. For this differentiation, accuracy rates ranging between 84 and 89% are still in need of improvement, especially due to a substantially lower sensitivity compared with specificity of actual methods [10],[12],[15]. Nevertheless, the use of biomarkers has significantly helped to improve diagnostic accuracy compared with diagnoses based solely on clinical and neuropsychological evaluation [16],[17]. For these reasons, recent studies have suggested to incorporate imaging findings into criteria for diagnosis of dementia [17],[18].

For AD patients imaging studies have shown reduced glucose consumption mainly in parietotemporal and posterior cingulate cortices [9],[20],[21] and structural changes in the hippocampus and entorhinal area relative to healthy controls [9],[21],[22]. In FTLD patients, atrophy and reduced metabolic rate for glucose

have been reported to be predominately located in the medial thalamus, amygdala and in frontotemporal and anterior cingulate cortices [4],[8],[20],[21],[23].

For multivariate differentiation of different types of dementia support vector machine classification (SVM) is used based on whole-brain voxel information [10] or most frequently on ROI values [6],[12]–[13],[24]–[26]. A major problem of the ROI-based approach is the limited generalizability of the trained classifier, because the ROIs are selected based on features showing a between-group differentiation in the same groups in a univariate analysis. Although ROIs selected with this method provide a good discrimination between groups used in these specific studies, they might show significantly reduced discrimination power when applied to new data sets. This could be the case if the selected regions just detect differences between groups, which are not necessarily attributed to the specific neurodegenerative disorder. Furthermore, AD and FTL D patients have been shown to develop a differential regional pattern of glucose hypometabolism and atrophy [21],[27]. However, the previously proposed approaches only used single modality information for the classification algorithms losing this way the differential information which various biomarkers might provide for a better detection and differentiation of dementia syndromes.

Here, we apply SVM as the most frequently used multivariate approach to evaluate its contribution for detection and differentiation of dementia in multimodal imaging. To increase the validity of our method we apply SVM classification on data extracted from ROIs based on disorder-specific metabolic reductions and atrophy reported in comprehensive meta-analyses investigating AD and FTL D. This method allows a better generalization of our classification algorithms to other clinical centers and ensures that only disorder-specific changes are used for SVM based discrimination. We hypothesize that common use of different imaging modalities might substantially improve early detection and differentiation of dementia.

## Methods

### Ethics Statement

The research protocol was approved by the Ethics Committee of the University of Leipzig, and was in accordance with the latest version of the Declaration of Helsinki. Informed consent was obtained from all subjects.

### Subjects

We analyzed FDG-PET and T1-weighted MRI data of 21 patients (Table 1) with an early stage of probable AD, 14 patients with an early stage of FTL D and 13 control subjects. Patients were recruited from the Day Clinic of Cognitive Neurology at the University of Leipzig. Probable AD was diagnosed according to NINCDS-ADRDA criteria [28]. Although all AD subjects also fulfilled the revised NINCDS-ADRDA criteria suggested by Dubois et al. [17] the fulfillment of the original McKhann criteria was sufficient for the inclusion into the study. Diagnosis of FTL D was based on criteria suggested by Neary et al. [29]. The control group included subjects who visited the Day Clinic with subjective cognitive complaints, which were not objectively confirmed by a comprehensive neuropsychological and clinical evaluation. FDG-PET and MRI for these subjects was conducted for diagnostic reasons within the clinical assessment. This control group was chosen because, in clinical practice, it is crucial to discriminate between these subjects showing a normal age-related decrease in cognitive performance and patients with an early stage of dementia. Patients were excluded if structural imaging revealed

**Table 1.** Subject group characteristics.

|                   | Controls  | AD        | FTLD      | ANOVA (df,F,P)  |
|-------------------|-----------|-----------|-----------|-----------------|
| Number            | 13        | 21        | 14        | –               |
| Male/Female       | 7/6       | 9/12      | 7/7       | –               |
| Age (years)       | 53.9±6.0  | 61.1±6.7  | 60.8±6.4  | 2, 5.76, 0.006  |
| CDR (score)       | 0.23±0.26 | 0.71±0.25 | 0.82±0.42 | 2, 13.93, 0.000 |
| MMSE (score)      | n.a.      | 23.2±3.9  | 24.4±4.2  | –               |
| Education (years) | 12.3±3.1  | 10.7±3.1  | 11.6±3.8  | 2,1.02,0.368    |

Mean ± standard deviation. AD Alzheimer's disease, ANOVA analysis of variance, CDR Clinical Dementia Rating Scale, FTL D frontotemporal lobar degeneration, MMSE Mini Mental State Examination, n.a. not available. doi:10.1371/journal.pone.0018111.t001

lesions due to stroke, traumatic head injury, brain tumor or inflammatory diseases.

### Data acquisition

**MRI data.** For each subject, a high-resolution T1-weighted MRI scan was obtained, consisting of 128 sagittal slices adjusted to AC-PC line and a with slice thickness of 1.5 mm and pixel size of  $1 \times 1 \text{ mm}^2$ . MRI was performed on two different 3T scanners (MedSpec 30/100, Bruker Biospin, Ettlingen Germany and Magnetom Trio, Siemens, Erlangen, Germany) using two different T1-weighted sequences (MDEFT or MP-RAGE with TR = 1300 ms, TI = 650 ms, TE = 3.93 ms or TE = 10 ms; FOV  $25 \times 25 \text{ cm}^2$ ; matrix =  $256 \times 256$  voxels). On the MedSpec scanner, only the MDEFT-sequence and on the Magnetom Trio scanner, either MDEFT or MP-RAGE sequences were used. The distribution of scanner types and sequences used to obtain the MRI data was random across subjects and did not differ significantly in its distribution between the groups nor for scanner type nor for sequence.

**PET data.** Each subject also underwent FDG-PET imaging either a few weeks before or after the MRI scan. All PET data were acquired on a Siemens ECAT EXACT HR+ scanner (CTI/Siemens, Knoxville, TN, USA) under a standard resting condition in 2-dimensional (2D) mode. The 2D acquisition mode was used because it allows a better quantification of the PET data due to lower scatter radiation. Sixty-three slices were simultaneously collected with an axial resolution of 5 mm full width at half maximum (FWHM) and in-plane resolution of 4.6 mm. After correction for attenuation, scatter, decay and scanner-specific dead-time, images were reconstructed by filtered back-projection using a Hann-filter of 4.9 mm FWHM. The 63 transaxial slices obtained had a matrix of  $128 \times 128$  voxels with an edge length of 2.45 mm.

### Image processing and statistical analysis

The procedure described below has been specifically designed for this study, aiming at a most accurate co-processing of FDG-PET and MRI data to obtain a more precise between subject anatomical overlap (Figure 1). All image-processing steps were carried out using the SPM5 software package (Statistical Parametric Mapping software: <http://www.fil.ion.ucl.ac.uk/spm/>) implemented in Matlab 7.7 (MathWorks Inc., Sherborn, MA). SVM classification was conducted with the LIBSVM software [30] using the Matlab interface.

**MR images.** The MR images were first interpolated to get an isotropic resolution of  $1 \times 1 \times 1 \text{ mm}^3$ . The resultant MR images

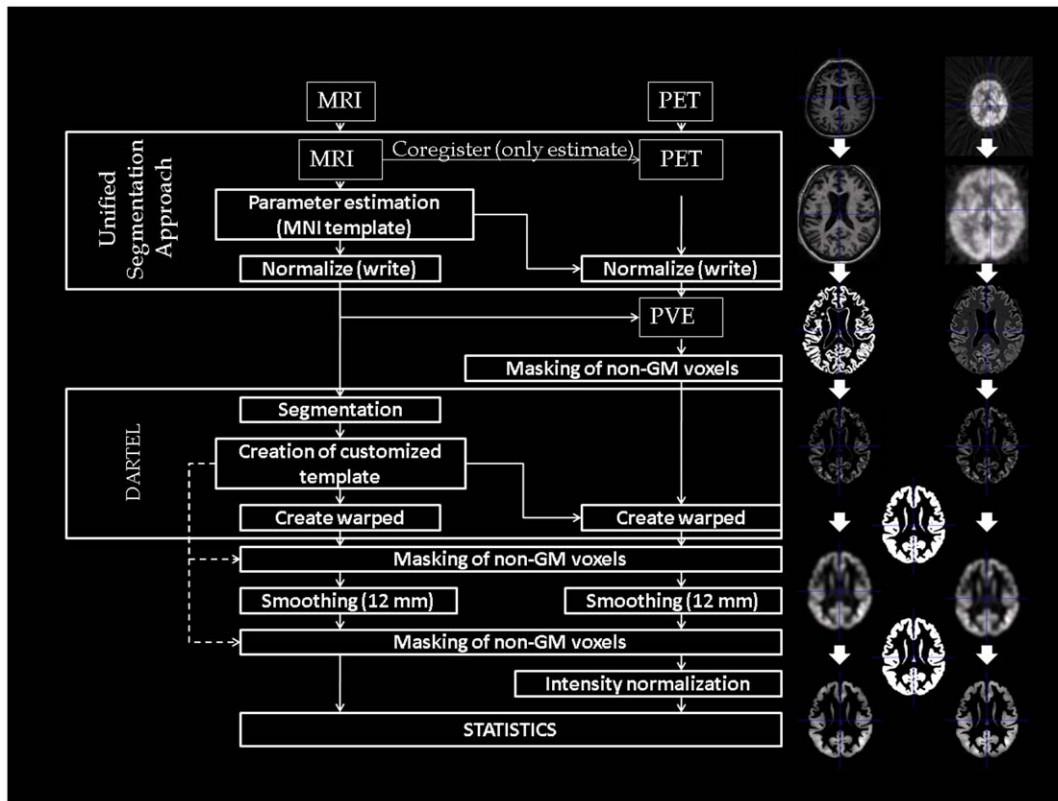

**Figure 1. Schematic representation of the procedure for FDG-PET and MRI data handling and processing steps.** FDG-PET [F18]fluorodeoxyglucose positron emission tomography, MRI magnetic resonance imaging, MNI Montreal Neurological Institute, PVE partial volume effect correction.

doi:10.1371/journal.pone.0018111.g001

were coregistered on their respective FDG-PET images and bias corrected for inhomogeneity artifacts using the Unified Segmentation Approach described in detail by Ashburner and Friston [31]. This specific method performs a better coregistration of images from different modalities and allows a more accurate segmentation due to the bias correction. A further reason to use this approach was that the straightforward coregistration implemented in the PVElab software described later sometimes failed. We used this software for automatic partial volume correction of the FDG-PET images. The coregistered MR images were processed using the DARTEL (Diffeomorphic Anatomical Registration Through Exponentiated Lie algebra) approach [32] to enable a more accurate spatial normalization. This approach registers all gray matter (GM) and white matter (WM) images to an averaged-size template created from all subjects used in this study and modulates the images to preserve the total amount of signal from each region in the images. Subsequently, the images were smoothed using a Gaussian kernel of 12 mm FWHM. This smoothing factor, although higher than usual MR kernels, was selected based on extensive tests, because it allows the optimal coevaluation with lower resolution FDG-PET images.

**FDG-PET data.** Within the common registration with MRI data using the Unified Segmentation Approach described above, PET images were interpolated to the same voxel size as the MR images, namely  $1 \times 1 \times 1 \text{ mm}^3$ . This processing does not introduce any additional noise into the PET images. However, in our experience, it substantially improves the subsequent partial volume effect (PVE) correction of voxels representing GM intensities using

the modified Müller-Gärtner method [33],[34]. Due to the interpolation, they are exactly overlaid with the MR tissue class images of the same subject obtained from the segmentation step in the PVE approach. Thus, the within-voxel correction is done only for those voxels directly overlaying the GM structures in the MR images. Instead of smoothing the MR data to the resolution of PET data and thus losing the exact quantitative and qualitative information of GM distribution, which is usually done in the PVE correction, the interpolation of FDG-PET preserves this information. This allows a more accurate correction of atrophy effects onto glucose utilization. The subsequent PVE correction including all image processing steps was done by using the automatic algorithm implemented in the PVElab software package [35]. Because the modified Müller-Gärtner method sets all WM voxel values to the mean WM intensity value, these regions do not contain any further valuable regional information after the PVE correction. For this reason, all voxels belonging to WM were masked using the ImCalc function in the SPM5 software package by filtering this specific intensity in the whole image. After the PVE correction, the DARTEL flow fields calculated from the MR images were applied to their respective PET images to obtain an anatomically exact overlap between GM and PET images of all subjects with modulation to preserve the total amount of signal from each region. In the same way as the MR data, the PET data were smoothed by a Gaussian kernel of 12 mm FWHM. Finally, the FDG-PET data were intensity normalized using cerebellar ROIs to account for individual differences in global PET measures. This region has been shown to be least affected in mild to moderate stages of AD [36]. Additionally, normalization to

this region improves the statistical discrimination between dementia patients and control subjects in comparison to other regions reported in the literature [37]–[39].

**Masking.** The MR and PET images obtained as described above were masked to avoid contamination by misclassified voxels. Voxels lying between WM and ventricular cerebrospinal fluid tend to be misclassified as GM voxels due to their similar intensity. The mask was obtained after extensive testing by excluding all voxels in the first and the last template created by the DARTEL approach with a probability of below 0.2 for belonging to GM and including only the voxels that exceed this threshold in both templates. This mask was applied twice: firstly prior to smoothing to avoid misclassification, and secondly, after the smoothing to avoid big edge effects. WM images were exclusively masked using the same mask to avoid overlaps between GM and WM voxels due to smoothing. The masked images were used for the subsequent SVM analysis of the data.

**ROI extraction.** ROI coordinates (Table 2) were extracted from two comprehensive, systematic and quantitative meta-analyses investigating biomarkers of AD and FTLD in MR and FDG-PET images. The meta-analyses included a total number of 1618 patients (AD/FTLD: 1351/267) and 1448 healthy control subjects (1097/351) [8],[9]. These meta-analyses extracted the prototypical networks of AD and FTLD by applying what is currently the most sophisticated and best-validated of coordinate-based voxel-wise meta-analyses, anatomical likelihood estimate. In the FTLD meta-analyses [8] only coordinates which are common to all subgroups of FTLD patients were used. In total, 10 regions from MRI and 6 regions from FDG-PET were used from the FTLD meta-analysis. From AD meta-analysis, 6 regions were used from both, MRI and FDG-PET. The AD meta-analysis also identified one additional region in the fornix which was differentiating between early-onset AD patients (age < 65 years) and control subjects but not between late-onset AD patients and control subjects. This region was not included into the ROI-based classification to avoid a discrimination bias towards early-onset AD patients. Although unequal numbers of ROIs were used from both imaging modalities, this number is also a highly important information as it also provides a measurement for the amount of changes present in a specific modality. Because the coordinates in both meta-analyses were reported in the Talairach space, they were transformed to MNI space according to a formula proposed by Matthew Brett (published on the Internet: <http://www.mrcctu.cam.ac.uk/Imaging/Common/mnispace.shtml>). DARTEL preprocessed data are registered to an averaged size template created from all subjects in this study. To transform these data to the MNI space we normalized them to an a priori MNI template in SPM by using affine-only spatial normalization. Due to the affine-only transformation, our images still differed in shape from the MNI template, so some reported coordinates were slightly outside of the anatomic regions in our imaging data. In this case, the center coordinates for the ROIs were moved slightly towards the closest point of the corresponding anatomical region reported in the meta-analyses. ROIs were selected using the 3D fill tool in the MRIcron software package (<http://www.sph.sc.edu/comd/rorden/mricron>). Separate ROI masks were created for MR and FDG-PET images based on the origin of the peak values reported in the meta-analyses and using all regions reported for AD and FTLD in a single mask for each modality. Each ROI was restricted to a sphere with a radius of 5 mm around the reported coordinate (Figure 2). Additionally, to increase the signal-to-noise ratio, all zero voxels and edge voxels with an intensity deviation of 13 intensity units in the MRIcron 3D fill tool were excluded from the ROI. The edge voxel restriction excludes all voxels at the edge of the smoothed GM structures within the sphere. These voxels carry much

**Table 2.** Coordinates of ROIs used for SVM classification.

| <b>FTLD vs. Controls</b>                                                        |           |            |          |            |
|---------------------------------------------------------------------------------|-----------|------------|----------|------------|
| <b>FDG-PET</b>                                                                  | <b>BA</b> | <b>Lat</b> | <b>x</b> | <b>y z</b> |
| Pregenuel anterior cingulate gyrus                                              | 24/32     | L          | -5       | 34 21      |
| Lentiform nucleus; Caudate head                                                 |           | L          | -20      | 3 -3       |
| Medial thalamus                                                                 |           | L          | -2       | -196       |
| Anterior insula                                                                 | 15/16     | L          | -47      | 10 -7      |
| Anterior medial frontal cortex                                                  | 10        | R          | 1        | 54 0       |
| Amygdala                                                                        |           | R          | 25       | -2 -25     |
| <b>MRI</b>                                                                      | <b>BA</b> | <b>Lat</b> | <b>x</b> | <b>y z</b> |
| Anterior medial frontal cortex                                                  | 9         | L          | -5       | 49 25      |
| Pregenuel anterior cingulate gyrus                                              | 24/32     | L          | -5       | 34 21      |
| Inferior frontal gyrus, pars opercularis                                        | 44        | L          | -54      | 11 20      |
| Lentiform nucleus; Caudate head                                                 |           | L          | -20      | 3 -3       |
| Anterior insula                                                                 | 15/16     | L          | -47      | 10 -7      |
| Subcallosal/septal area                                                         | 25        | L          | -2       | 10 -10     |
| Amygdala                                                                        |           | R          | 25       | -2 -25     |
| Amygdala; Ento-and perirhinal cortex                                            |           | L          | -26      | -5 -25     |
| Temporal pole                                                                   | 38        | L          | -29      | 11 -43     |
| Temporal pole                                                                   | 38        | L          | -47      | 8 -44      |
| <b>AD vs. Controls</b>                                                          |           |            |          |            |
| <b>FDG-PET</b>                                                                  | <b>BA</b> | <b>Lat</b> | <b>x</b> | <b>y z</b> |
| Angular gyrus                                                                   | 39        | L          | -38      | -68 37     |
| Angular gyrus                                                                   | 39        | R          | 43       | -68 33     |
| Posterior superior temporal sulcus                                              | 21/22     |            |          |            |
| Anterior medial frontal cortex                                                  | 9/10      | R          | 1        | 31 31      |
| Pregenuel anterior cingulate gyrus                                              | 32        |            |          |            |
| Inferior precuneus                                                              | 31        | R          | 1        | -36 27     |
| Dorsal posterior cingulate cortex                                               | 23        |            |          |            |
| Posterior superior temporal sulcus                                              | 21/22     | L          | -51      | -61 23     |
| Middle inferior temporal sulcus                                                 | 20/21     | R          | 59       | -31 -23    |
| <b>MRI</b>                                                                      | <b>BA</b> | <b>Lat</b> | <b>x</b> | <b>y z</b> |
| Posterior insula                                                                | 13        | L          | -38      | -25 15     |
| Medial thalamus                                                                 |           | L          | -5       | -13 3      |
| Hippocampal body/tail                                                           |           | R          | 31       | -38 -6     |
| Middle temporal gyrus/superior temporal sulcus                                  | 21/22     | L          | -63      | -21 -5     |
| Amygdala, anterior hippocampal formation, 28/34 uncus, (trans-) entorhinal area |           | R          | 25       | -8 -18     |
| Amygdala, anterior hippocampal formation, 28/34 uncus, (trans-) entorhinal area |           | L          | -26      | -8 -18     |

Coordinates are in MNI space (L left, R right). AD Alzheimer's disease, BA Brodmann area, FDG-PET [18F]fluorodeoxyglucose positron emission tomography, MRI magnetic resonance imaging, ROI region-of-interest, SVM support vector machine.  
doi:10.1371/journal.pone.0018111.t002

less information due to their further distance from the GM structures in the unsmoothed data and so decrease the signal-to-noise ratio in the corresponding ROI.

**SVM.** Multivariate pattern classification, as described in Klöppel et al. [10], was performed with a linear kernel by identifying a separating hyperplane that maximizes the distance



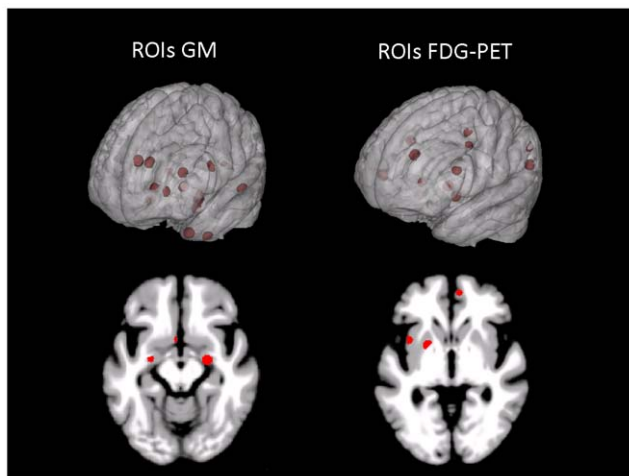

**Figure 2. Regions of interest extracted from gray matter (left) and FDG-PET (right) data for AD and FTLD patients and used for support vector machine classification projected onto a glass brain (top) and onto an axial slice (bottom).** AD Alzheimer's disease, FDG-PET [F18]fluorodeoxyglucose positron emission tomography, FTLD frontotemporal lobar degeneration, GM gray matter, ROIs regions of interest.

doi:10.1371/journal.pone.0018111.g002

between different clinical groups based on whole-brain or ROIs information. The cross-validation of the trained SVM was performed by using the leave-one-out method. This procedure iteratively leaves out the information of each subject and trains the model on the remaining subjects for subsequent class assignment of the person that was not included in the training procedure. This validation method enables the generalization of the trained SVM to data that have never been presented to the SVM algorithms previously. The reported accuracy is the percentage of subjects correctly assigned to the clinical diagnosis. Usually SVM classification is performed without smoothing of the data, because single voxels are assumed to contain information, for example, for prediction of future action based on functional MR images. However, in neurodegenerative disorders single voxels are unlikely to contain generalizable information due to a limited across-subject registration of MR and FDG-PET images. Although SVM classification based on unsmoothed data has been shown to differentiate reasonably between different groups (Klöppel et al., 2007), an additional smoothing should make this approach more reliable and generalizable to new data. To control for the effect of smoothing we ran the same whole-brain classification twice for GM, PET and for integration of GM and PET in the same vector with and without smoothing.

We performed the whole-brain SVM classification using GM, WM or FDG-PET images separately and by combining information from different modalities. For the SVM classification, all data of a subject are transformed into a vector, with information of an additional modality simply attached by extending the vector. Additionally, we repeated the whole-brain SVM classification by adding MR to FDG-PET information combining both modalities in a single image. ROI-based SVM classification was performed on data extracted from smoothed images separately for GM and FDG-PET images and also by integrating information from both modalities in a single vector. In order to reduce the number of voxels in the ROI-based classification, only nonzero voxels were included in the vector. This was done because otherwise the whole-brain SVM

classification is a highly memory-consuming approach. To ensure that our classification results were not based on factors randomly discriminating between groups, we reran the whole-brain and ROI-based classification for comparison 30 times by randomly assigning all subjects to the three groups independently from the clinical diagnosis and calculating the classification accuracy by using the leave-one-out procedure described above.

**Statistical analysis.** Group comparisons for age, education and CDR (Clinical Dementia Rating Scale) [40] were performed by conducting ANOVAs (analyses of variance). If an ANOVA revealed a significant between-group effect, a Bonferroni t-test was calculated with a significance threshold of  $p < 0.05$  (corrected for multiple comparisons, two-tailed). MMSE (Mini Mental State Examination) [41], was only present for 20 patients with AD and 11 patients with FTLD. MMSE scores of these two groups were compared to each other using an independent samples t-test. Group differences regarding sex were evaluated using a chi-square test for independent samples. The statistical analysis was performed with the commercial software package SPSS 17.0 (<http://www.spss.com/statistics/>).

## Results

### Clinical characteristics

The chi-square test for independent samples did not reveal any statistical differences in sex between the groups [ $\chi^2(2) = 0.42$ ;  $p = 0.809$ ]. The three groups did not differ in education (Table 1). CDR scores differed significantly in the three groups. The post-hoc test revealed no differences in the mean CDR scores between both groups of dementia patients [ $t(33) = 0.94$ ;  $p = 0.977$ ]. As expected, both early AD [ $t(32) = 5.36$ ;  $p < 0.001$ ] and early FTLD [ $t(25) = 4.35$ ;  $p < 0.001$ ] had significantly higher CDR scores compared to the control subjects. MMSE scores also did not differ between both groups of dementia patients indicating a similar severity of dementia syndrome [ $t(29) = -81$ ;  $p = 0.95$ ]. The ANOVA also revealed a significant group difference in age. The two groups of dementia patients did not differ significantly in age [ $t(33) = 0.16$ ;  $p = 1.0$ ]. There was a minor but significant difference between AD patients and controls [ $t(32) = 3.18$ ;  $p = 0.008$ ] and FTLD patients and controls [ $t(25) = 2.86$ ;  $p = 0.024$ ].

### SVM – Whole-brain analysis

Multivariate classification of the data using SVM at the whole-brain level revealed the best discrimination accuracy for all three groups using FDG-PET, with 81% (chance level 33%), in comparison to GM and WM information, with lowest accuracy using WM information on its own (Table 3). The combination of metabolism and GM values in a single image revealed a similar accuracy for differentiation of the three groups, with higher accuracy for differentiation between both types of dementia, however, with slightly lower discrimination between dementia patients and control subjects. Whole-brain SVM classification for the three groups without smoothing revealed lower accuracy rates in all classifications in comparison to differentiation based on smoothed images. The accuracy increase due to smoothing ranged between 2% (GM) and 6% (FDG-PET). Figure 3 displays regions that were most influential in making binary classification between the AD, FTLD and control subjects based on smoothed whole-brain information.

### SVM – ROI analysis

Accuracy based on ROIs from both meta-analyses using only GM information was substantially lower for differentiation between AD and FTLD patients in comparison with whole-brain classification. However, it was comparable to the whole-brain

**Table 3.** Accuracy rates for whole-brain and ROI-based SVM classification for FDG-PET and MRI.

|                           | AD, FTLD and Controls | AD vs FTLD | AD vs Controls | FTLD vs Controls |
|---------------------------|-----------------------|------------|----------------|------------------|
| GM whole-brain            | 72.9%                 | 80.0%      | 88.2%          | 77.8%            |
| WM whole-brain            | 66.7%                 | 74.3%      | 79.4%          | 77.8%            |
| FDG-PET whole-brain       | 81.3%                 | 82.9%      | 94.1%          | 92.6%            |
| GM/ FDG-PET whole-brain   | 79.2%                 | 82.9%      | 94.1%          | 88.9%            |
| GM/WM/FDG-PET whole-brain | 77.1%                 | 82.9%      | 91.2%          | 85.2%            |
| GM + FDG-PET whole-brain  | 81.3%                 | 88.6%      | 91.2%          | 88.9%            |
| GM ROIs                   | 56.3%                 | 60.0%      | 82.4%          | 85.2%            |
| FDG-PET ROIs              | 75.0%                 | 80.0%      | 94.1%          | 85.2%            |
| GM/FDG-PET ROIs           | 91.7%                 | 94.3%      | 100.0%         | 92.6%            |

Accuracy represents the percentage of subjects correctly assigned to the correct condition. AD Alzheimer's disease, FDG-PET [18F]fluorodeoxyglucose positron emission tomography, FTLD frontotemporal lobar degeneration, GM gray matter, MRI magnetic resonance imaging, ROI region-of-interest, SVM support vector machine, WM white matter.

doi:10.1371/journal.pone.0018111.t003

approach in differentiating between patients with both types of dementia and control subjects. ROIs extracted from FDG-PET data showed slightly lower discrimination accuracy compared to whole-brain information. The best accuracy rates of all SVM classifications were obtained using combined information extracted from FDG-PET and GM data. This approach resulted in a classification accuracy of 92% for the differentiation of all three groups and an accuracy rate of 94% for differentiation between AD and FTLD patients. Sensitivity of this ROI-based classification ranged between 85.7% for FTLD and 100% for AD and specificity of 100% for discrimination of both types of dementia from control subjects (Table 4).

The classification accuracy in the 30 trials randomly assigning all subjects to the three groups resulted in a mean accuracy rate of  $34 \pm 7.7\%$  (mean  $\pm$  standard deviation), ranging between 21 and 52% for the ROI-based SVM classification, and  $33.7 \pm 8.2\%$  ranging between 12 and 50% for the whole-brain classification.

## Discussion

In this study we performed a multimodal comparison and discrimination of dementia patients using FDG-PET and MRI. To enable a more accurate coevaluation of both imaging modalities, we developed a new preprocessing algorithm. This algorithm was designed to enable an accurate anatomical registration of both modalities. All processing steps were performed as far as possible simultaneously by applying the same deformations and preprocessing parameters to both modalities of the same subject. This procedure resulted in an accurate anatomical overlap of both imaging modalities and in an accurate between-subject registration, with both images having the same voxel size and approximately the same effective smoothness.

## SVM

SVM classification is a very promising tool for detection and differentiation of different dementia syndromes, as has been shown

by previous studies [10],[12],[13],[24]. It not only captures univariate relationships of a single voxel across all subjects but is also able to detect multivariate relationships over a large group of information, as, for example, between different structures and modalities in the brain. Furthermore, this tool provides an easy way to use this information for classifying imaging data of new subjects to a specific condition.

Here, we systematically compared different information provided by FDG-PET and MRI to enable the most accurate detection and differentiation of dementia. The diagnosis was based on comprehensive clinical and neuropsychological testing. Although the data are not histopathologically confirmed to be sure of assigning them to the correct condition, generally higher conformity with the clinical diagnosis should also result in more accurate classification of histopathologically validated data.

The whole-brain SVM classification provided the most accurate classification using only FDG-PET information. GM and WM based classification accuracy was lower for all comparisons indicating a lower sensitivity for detection of dementia-relevant information. Nonetheless, classification based on GM, WM and FDG-PET separately or combining them revealed a discrimination accuracy which was above chance level for the correct categorization of the three groups. All classification results substantially exceeded the best classification accuracy obtained by randomly assigning all subjects to different groups. Additionally, smoothing of the data improved the classification accuracy in both imaging modalities as expected.

However, in whole-brain classification noise is introduced by using a great deal of information for classification that does not differentiate between the groups. Recent comprehensive meta-analyses identified the "prototypical" networks for both disorders in both modalities using VBM [8],[9]. The involved regions have been shown to be affected in AD and FTLD patients most consistently in all studies investigating these disorders. By using this information, we ruled out the possibility that our classification results are dependent to our group of patients. Although this

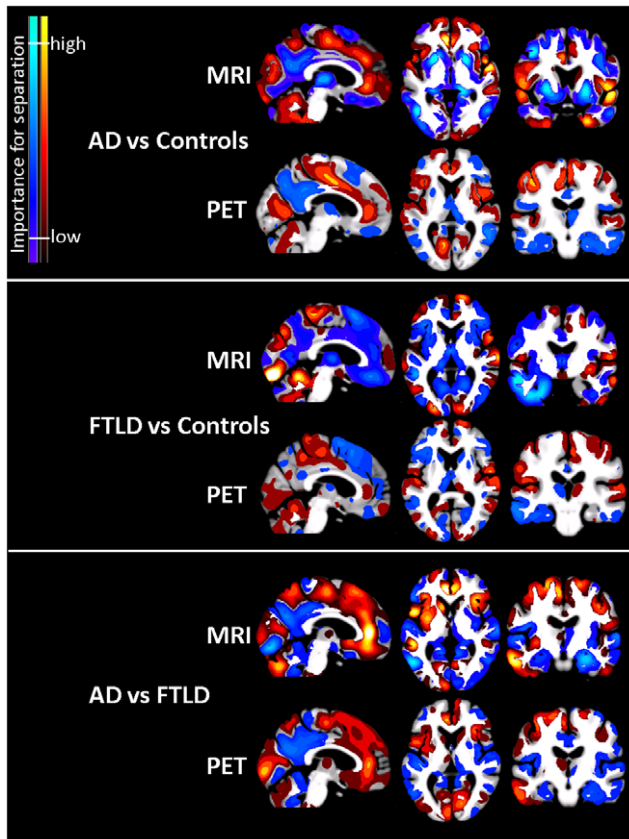

**Figure 3. Weights of voxels most relevant for classification of both groups of patients and control subjects in FDG-PET and MRI after SVM training.** Weights are relative, and have no applicable units. AD and FTLD vs Controls: Blue and light blue indicate decreased gray matter intensity (upper row) or reduced metabolic rate (lower row) that increase the likelihood of classification into a dementia group. Red and yellow indicate the opposite. AD vs FTLD: Blue and light blue indicate decreased gray matter intensity (upper row) or reduced metabolic rate (lower row) that increase the likelihood of classification into the AD group. Red and yellow indicate the opposite. Regions with bright colors (yellow and light blue) have a higher importance for separation than regions with dark colors (blue and red). AD Alzheimer's disease, FTLD frontotemporal lobar degeneration, MRI magnetic resonance imaging, PET positron emission tomography. doi:10.1371/journal.pone.0018111.g003

method provides lower accuracy rates for GM or FDG-PET information on their own, it shows a significantly higher discrimination rate by combining both information modalities into a single vector. This ROI-based discrimination is superior to

**Table 4. Differentiation rates for combined region-of-interest information from FDG-PET and MRI.**

|                  | Accuracy | Sensitivity | Specificity |
|------------------|----------|-------------|-------------|
| AD vs FTLD       | 94.3%    | 95.2%*      | 92.9%       |
| AD vs Controls   | 100.0%   | 100.0%      | 100.0%      |
| FTLD vs Controls | 92.6%    | 85.7%       | 100.0%      |

\*Considering a correctly identified AD as a true positive. AD Alzheimer's disease, FDG-PET [18F]fluorodeoxyglucose positron emission tomography, FTLD frontotemporal lobar degeneration, MRI magnetic resonance imaging. doi:10.1371/journal.pone.0018111.t004

whole-brain classification with the highest accuracy gain for the differentiation of both types of dementia, which, with 94%, is the highest differentiation rate reported up to now. Accordingly, we suggest this method as a diagnostic standard for the classification of dementia syndromes.

Nonetheless, some limitations should be considered regarding the results of the present study. First of all, the number of subjects used for classification is too low to allow a generalizable conclusion for patients from other clinical centers. This is especially a problem because the accuracy of the clinical diagnosis for specific dementia syndromes, which was used here for validation, strongly varies between different clinical centers. Therefore, in a future work this approach should be validated using a larger and more generalizable dataset like the data provided by the Alzheimer's disease Neuroimaging Initiative (ADNI: [www.adni-info.org](http://www.adni-info.org)). A further limitation of the present work is the significantly younger age of the control group in comparison to the patient cohort. However, this aspect might only have contributed to the discrimination between dementia patients and control subjects but not to the high classification accuracy of AD and FTLD patients as these were very similar in their age range. If age contributed to the classification accuracy there should be lower classification accuracy for young dementia patients and older control subjects as they did not differ in age. For comparison of both types of dementia patients and control subjects the classification accuracy did not differ for younger and older dementia patients although half of the patients were in the same age range as the control group. In AD group all patients were classified correctly. In FTLD group one younger and one older patient were misclassified. Independently of age, all control subjects were classified correctly for both comparisons. These results indicate that the slight mean age differences is not the decisive factor for the high discrimination accuracy using combined information from FDG-PET and MRI. Furthermore, if age still slightly contributed to the high discrimination of dementia patients and control subjects this contribution was also present in all other single modality and multimodal whole-brain and ROI-based SVM classifications applied in this study. Therefore, age cannot account for increased differentiation accuracies when combined ROI information from FDG-PET and MRI are used for differentiation of dementia patients and control subjects.

Another point is that subjects in the control group in our study reported subjective cognitive complaints which might have limited the interpretation of the results of our study. However, only subjects were included whose cognitive complaints were not confirmed by comprehensive neuropsychological evaluation. The CDR is a semi-structural interview and is highly dependent on the subjectively perceived memory impairment which resulted in a CDR score of 0.5 for these control subjects in our study. In recent literature it has been shown that the CDR stage of 0.5 has a poor discriminative value for healthy control subjects and subjects with Mild Cognitive Impairment (MCI) [42],[43]. Meguro et al. [42] have shown that about 30% of a normal population older than 65 got a CDR score of 0.5 while the prevalence of MCI in the same population was only about 5% which suggests that CDR score of 0.5 is not a good indicator of MCI. Due to the absence of any objective cognitive impairment in all neuropsychological tests for all subjects included in the control group in our study this group of subjects can be regarded as cognitively unimpaired.

## Conclusion and perspectives

In our study, we investigated the advantages of SVM classification using combined information from FDG-PET and MRI to improve detection and differentiation of dementia.

Furthermore, based on affected regions reported in previous studies, investigating Alzheimer's disease and frontotemporal lobar degeneration with univariate approaches and summarized in two meta-analyses, we applied linear support vector machine classification algorithm using information from both imaging modalities. Combining region-of-interest information from FDG-PET and MRI resulted in a substantial gain in accuracy compared to whole-brain and to single modality classification for both detection and differentiation of Alzheimer's disease and frontotemporal lobar degeneration. Our results indicate that integration and combina-

tion of results from different imaging modalities might provide a new way to improve the diagnostic accuracy of these dementia disorders.

## Author Contributions

Conceived and designed the experiments: JD KM AH HB HEM AV OS MLS. Performed the experiments: JD KM AH HB HEM AV OS MLS. Analyzed the data: JD KM AH HB HEM AV OS MLS. Contributed reagents/materials/analysis tools: JD KM AH HB HEM AV OS MLS. Wrote the paper: JD KM AH HB HEM AV OS MLS.

## References

- Hoffman JM, Welsh-Bohmer KA, Hanson M, Crain B, Hulette C, et al. (2000) FDG PET imaging in patients with pathologically verified dementia. *J Nucl Med* 41: 1920–1928.
- Rosen HJ, Gorno-Tempini ML, Goldman WP, Perry RJ, Schuff N, et al. (2002) Patterns of brain atrophy in frontotemporal dementia and semantic dementia. *Neurology* 58: 198–208.
- Diehl J, Grimmer T, Drzezga A, Riemenschneider M, Forstl H, et al. (2004) Cerebral metabolic patterns at early stages of frontotemporal dementia and semantic dementia. A PET study. *Neurobiol Aging* 25: 1051–1056.
- Jeong Y, Cho SS, Park JM, Kang SJ, Lee JS, et al. (2005) 18F-FDG PET findings in frontotemporal dementia: an SPM analysis of 29 patients. *J Nucl Med* 46: 233–239.
- Diehl-Schmid J, Grimmer T, Drzezga A, Bornschein S, Riemenschneider M, et al. (2007) Decline of cerebral glucose metabolism in frontotemporal dementia: a longitudinal 18F-FDG-PET-study. *Neurobiol Aging* 28: 42–50.
- Fung G, Stoeckel J (2007) SVM feature selection for classification of SPECT images of Alzheimer's disease using spatial information. *Knowledge and Information Systems* 11: 243–258.
- Sabri O, Kendziorra K, Wolf H, Gertz HJ, Brust P (2008) Acetylcholine receptors in dementia and mild cognitive impairment. *Eur J Nucl Med Mol Imaging* 35(Suppl 1): S30–45.
- Schroeter ML, Raczka K, Neumann J, Yves von Cramon D (2007) Towards a nosology for frontotemporal lobar degenerations—a meta-analysis involving 267 subjects. *Neuroimage* 36: 497–510.
- Schroeter ML, Stein T, Maslowski N, Neumann J (2009) Neural correlates of Alzheimer's disease and mild cognitive impairment: a systematic and quantitative meta-analysis involving 1351 patients. *Neuroimage* 47: 1196–1206.
- Kloppel S, Stonnington CM, Chu C, Draganski B, Schill RI, et al. (2008) Automatic classification of MR scans in Alzheimer's disease. *Brain* 131: 681–689.
- Matsunari I, Samuraki M, Chen WP, Yanase D, Takeda N, et al. (2007) Comparison of 18F-FDG PET and optimized voxel-based morphometry for detection of Alzheimer's disease: aging effect on diagnostic performance. *J Nucl Med* 48: 1961–1970.
- Davatzikos C, Resnick SM, Wu X, Parmpi P, Clark CM (2008) Individual patient diagnosis of AD and FTD via high-dimensional pattern classification of MRI. *Neuroimage* 41: 1220–1227.
- Fan Y, Resnick SM, Wu X, Davatzikos C (2008) Structural and functional biomarkers of prodromal Alzheimer's disease: a high-dimensional pattern classification study. *Neuroimage* 41: 277–285.
- Sadeghi N, Foster NL, Wang AY, Minoshima S, Lieberman AP, et al. (2008) Automatic classification of Alzheimer's disease vs. Frontotemporal dementia: A spatial decision tree approach with FDG-PET. 2008 IEEE International Symposium on Biomedical Imaging: From Nano to Macro Vols 1–4: 408–411.
- Knopman DS, Boeve BF, Parisi JE, Dickson DW, Smith GE, et al. (2005) Antemortem diagnosis of frontotemporal lobar degeneration. *Ann Neurol* 57: 480–488.
- Rascovsky K, Salmon DP, Ho GJ, Galasko D, Peavy GM, et al. (2002) Cognitive profiles differ in autopsy-confirmed frontotemporal dementia and AD. *Neurology* 58: 1801–1808.
- Dubois B, Feldman HH, Jacova C, Dekosky ST, Barberger-Gateau P, et al. (2007) Research criteria for the diagnosis of Alzheimer's disease: revising the NINCDS-ADRDA criteria. *Lancet Neurol* 6: 734–746.
- Kipps CM, Hodges JR, Fryer TD, Nestor PJ (2009) Combined magnetic resonance imaging and positron emission tomography brain imaging in behavioural variant frontotemporal degeneration: refining the clinical phenotype. *Brain* 132: 2566–2578.
- Ishii K, Willoch F, Minoshima S, Drzezga A, Ficarot EP, et al. (2001) Statistical brain mapping of 18F-FDG PET in Alzheimer's disease: validation of anatomic standardization for atrophied brains. *J Nucl Med* 42: 548–557.
- Ishii K, Sasaki H, Kono AK, Miyamoto N, Fukuda T, et al. (2005) Comparison of gray matter and metabolic reduction in mild Alzheimer's disease using FDG-PET and voxel-based morphometric MR studies. *Eur J Nucl Med Mol Imaging* 32: 959–963.
- Kanda T, Ishii K, Uemura T, Miyamoto N, Yoshikawa T, et al. (2008) Comparison of grey matter and metabolic reductions in frontotemporal dementia using FDG-PET and voxel-based morphometric MR studies. *Eur J Nucl Med Mol Imaging* 35: 2227–2234.
- van de Pol LA, Hensel A, van der Flier WM, Visser PJ, Pijnenburg YA, et al. (2006) Hippocampal atrophy on MRI in frontotemporal lobar degeneration and Alzheimer's disease. *J Neurol Neurosurg Psychiatry* 77: 439–442.
- Schroeter ML, Raczka K, Neumann J, von Cramon DY (2008) Neural networks in frontotemporal dementia—a meta-analysis. *Neurobiol Aging* 29: 418–426.
- Chaves R, Ramirez J, Gorriz JM, Lopez M, Salas-Gonzalez D, et al. (2009) SVM-based computer-aided diagnosis of the Alzheimer's disease using t-test NMSE feature selection with feature correlation weighting. *Neurosci Lett* 461: 293–297.
- Horn JF, Habert MO, Kas A, Malek Z, Maksud P, et al. (2009) Differential automatic diagnosis between Alzheimer's disease and frontotemporal dementia based on perfusion SPECT images. *Artif Intell Med* 47: 147–158.
- Ramirez J, Gorriz JM, Salas-Gonzalez D, Romero A, Lopez M, et al. (2009) Computer-aided diagnosis of Alzheimer's type dementia combining support vector machines and discriminant set of features. *Information Sciences*: doi:10.1016/j.ins.2009.05.012.
- Rabinovici GD, Seeley WW, Kim EJ, Gorno-Tempini ML, Rascovsky K, et al. (2007) Distinct MRI atrophy patterns in autopsy-proven Alzheimer's disease and frontotemporal lobar degeneration. *Am J Alzheimers Dis Other Demen* 22: 474–488.
- McKhann G, Drachman D, Folstein M, Katzman R, Price D, et al. (1984) Clinical diagnosis of Alzheimer's disease: report of the NINCDS-ADRDA Work Group under the auspices of Department of Health and Human Services Task Force on Alzheimer's Disease. *Neurology* 34: 939–944.
- Neary D, Snowden JS, Gustafson L, Passant U, Stuss D, et al. (1998) Frontotemporal lobar degeneration: a consensus on clinical diagnostic criteria. *Neurology* 51: 1546–1554.
- Chang CC, Lin CJ (2001) LIBSVM: a library for support vector machines. Software available at: <http://www.csie.ntu.edu.tw/~cjlin/libsvm>.
- Ashburner J, Friston KJ (2005) Unified segmentation. *Neuroimage* 26: 839–851.
- Ashburner J (2007) A fast diffeomorphic image registration algorithm. *Neuroimage* 38: 95–113.
- Muller-Gartner HW, Links JM, Prince JL, Bryan RN, McVeigh E, et al. (1992) Measurement of radiotracer concentration in brain gray matter using positron emission tomography: MRI-based correction for partial volume effects. *J Cereb Blood Flow Metab* 12: 571–583.
- Roussot OG, Ma Y, Evans AC (1998) Correction for partial volume effects in PET: principle and validation. *J Nucl Med* 39: 904–911.
- Quarantelli M, Berkouk K, Prinstner A, Landeau B, Svarer C, et al. (2004) Integrated software for the analysis of brain PET/SPECT studies with partial-volume-effect correction. *J Nucl Med* 45: 192–201.
- Ishii K, Sasaki M, Kitagaki H, Yamaji S, Sakamoto S, et al. (1997) Reduction of cerebellar glucose metabolism in advanced Alzheimer's disease. *J Nucl Med* 38: 925–928.
- Yakushev I, Landvogt C, Buchholz HG, Fellgiebel A, Hammers A, et al. (2008) Choice of reference area in studies of Alzheimer's disease using positron emission tomography with fluorodeoxyglucose-F18. *Psychiatry Res* 164: 143–153.
- Yakushev I, Hammers A, Fellgiebel A, Schmidtman I, Scheurich A, et al. (2009) SPM-based count normalization provides excellent discrimination of mild Alzheimer's disease and amnesic mild cognitive impairment from healthy aging. *Neuroimage* 44: 43–50.
- Dukart J, Mueller K, Horstmann A, Vogt B, Frisch S, et al. (2010) Differential effects of global and cerebellar normalization on detection and differentiation of dementia in FDG-PET studies. *Neuroimage* 49: 1490–1495.
- Morris JC (1993) The Clinical Dementia Rating (CDR): current version and scoring rules. *Neurology* 43: 2412–2414.
- Folstein MF, Folstein SE, McHugh PR (1975) Mini-Mental State (a practical method for grading the state of patients for the clinician). *Journal of Psychiatric Research* 12: 129–138.
- Meguro K, Ishii H, Yamaguchi S, Ishizaki J, Sato M, et al. (2004) Prevalence and cognitive performances of clinical dementia rating 0.5 and mild cognitive impairment in Japan. The Tajiri project. *Alzheimer disease and associated disorders* 18: 3–10.
- Pernecky R, Wagenpfeil S, Komossa K, Grimmer T, Diehl J, et al. (2006) Mapping scores onto stages: mini-mental state examination and clinical dementia rating. *The American journal of geriatric psychiatry: official journal of the American Association for Geriatric Psychiatry* 14: 139–144.
